# Supplementary material for: Stool Bacteriomic Profiling in Patients with Metastatic Renal Cell Carcinoma Receiving Vascular Endothelial Growth Factor–Tyrosine Kinase Inhibitors
Source: Oxford University Press journal article supplement (doi:10.1158/1078-0432.ccr-15-0724), 2015-07-07
Supplement: 10780432ccr150724-sup-147185_2_supp_3020429_nq087v.doc [file 10780432ccr150724-sup-147185_2_supp_3020429_nq087v.doc]

**Supplementary Table 1**. 10 OTUs with smallest P-values at genus and species levels. Comparisons are made between the 2 clusters using PAM clustering with JSD distance

| **Bacterial** | **Mean difference in abundance** | **P-value** |
| --- | --- | --- |
| **Genus level** |  |  |
| f__Bacteroidaceae;g__Bacteroides | 32.55 | 0.001 |
| f__Prevotellaceae;g__Prevotella | -42.89 | 0.004 |
| f__Porphyromonadaceae;g__Candidatus Azobacteroides | 0.01 | 0.03 |
| f__Coriobacteriaceae;g__Eggerthella | 0.01 | 0.03 |
| f__Desulfovibrionaceae;g__Bilophila | 0.02 | 0.07 |
| f__Ruminococcaceae;g__Anaerotruncus | 0.13 | 0.08 |
| f__Lachnospiraceae;g__Anaerostipes | 0.07 | 0.10 |
| f__Rikenellaceae;g__ | 1.89 | 0.11 |
| f__Ruminococcaceae;g__Faecalibacterium | 1.82 | 0.14 |
| f__Rikenellaceae;g__human | 0.01 | 0.17 |
| **Species level** |  |  |
| f__Bacteroidaceae;g__Bacteroides;s__ | 26.10 | <0.001 |
| f__Bacteroidaceae;g__Bacteroides;s__acidifaciens | 14.61 | 0.002 |
| f__Bacteroidaceae;g__Bacteroides;s__caccae | 0.05 | 0.003 |
| f__Bacteroidaceae;g__Bacteroides;s__fragilis | 0.27 | 0.003 |
| f__Bacteroidaceae;g__Bacteroides;s__ovatus | 0.13 | 0.004 |
| f__Bacteroidaceae;g__Bacteroides;s__uniformis | 0.21 | 0.01 |
| f__Porphyromonadaceae;g__Candidatus Azobacteroides;s__ | 0.01 | 0.02 |
| f__Rikenellaceae;g__;s__ | 2.61 | 0.02 |
| f__Prevotellaceae;g__Prevotella;s__copri | -24.12 | 0.04 |
| f__Desulfovibrionaceae;g__Bilophila;s__ | 0.02 | 0.07 |
