# Supplementary material for: Stool Bacteriomic Profiling in Patients with Metastatic Renal Cell Carcinoma Receiving Vascular Endothelial Growth Factor–Tyrosine Kinase Inhibitors
Source: Oxford University Press journal article supplement (doi:10.1158/1078-0432.ccr-15-0724), 2015-07-07
Supplement: 10780432ccr150724-sup-147185_2_supp_3020430_nq087v.doc [file 10780432ccr150724-sup-147185_2_supp_3020430_nq087v.doc]

**Supplementary Table 2**. 10 OTUs with smallest P-values at genus and species levels. Comparisons are made between diarrhea and non-diarrhea patients.

| **Bacterial** | **Mean difference in abundance** | **P-value** |
| --- | --- | --- |
| **Genus level** |  |  |
| f__EtOH8;g__ | 0.18 | 0.02 |
| f__Rikenellaceae;g__human | 0.01 | 0.03 |
| f__Desulfovibrionaceae;g__Bilophila | 0.02 | 0.04 |
| f__[Odoribacteraceae];g__Butyricimona | 0.17 | 0.05 |
| f__Clostridiaceae;g__Clostridium | -0.25 | 0.05 |
| f__[Odoribacteraceae];g__Odoribacter | 0.71 | 0.07 |
| f__[Barnesiellaceae];g__ | 0.71 | 0.12 |
| f__Aerococcaceae;g__Lacticigenium | -0.03 | 0.13 |
| f__Alcaligenaceae;g__Sutterella | 0.66 | 0.14 |
| f__Dethiosulfovibrionaceae;g__Pyramidobacter | 0.02 | 0.15 |
| **Species level** |  |  |
| f__EtOH8;g__;s__ | 0.19 | 0.02 |
| f__Bacteroidaceae;g__Bacteroides;s__uniformis | 0.20 | 0.03 |
| f__Rikenellaceae;g__human;s__gut metagenome | 0.01 | 0.03 |
| f__Desulfovibrionaceae;g__Bilophila;s__ | 0.02 | 0.04 |
| f__[Odoribacteraceae];g__Butyricimonas;s__ | 0.17 | 0.05 |
| f__[Odoribacteraceae];g__Odoribacter;s__ | 0.70 | 0.07 |
| f__[Barnesiellaceae];g__;s__ | 0.71 | 0.12 |
| f__Aerococcaceae;g__Lacticigenium;s__naphtae | -0.03 | 0.13 |
| f__Porphyromonadaceae;g__Parabacteroides;s__ | 0.10 | 0.14 |
| f__Alcaligenaceae;g__Sutterella;s__ | 0.66 | 0.14 |
